# Supplementary material for: Viviparity imparts a macroevolutionary signature of ecological opportunity in Liolaemus lizards
Source: Research Square preprint supplement (doi:10.21203/rs.3.rs-3293672/v1), 2023-09-13
Supplement: Supplementary file 1 [file 8ba65bcc44ef3df1433b3965.xlsx]

## Sheet: Data
Species	Parity mode	Reference	Diet	Reference	Substrate use	Reference	SVL_females	log_SVL	SD	n	Lat	Lon	Elev	MAT	References	Notes
Liolaemus_abaucan	Oviparous	Esquerré et al., 2019	Omnivorous	Espinoza et al., 2004; Meiri, 2018	Terrestrial	Ibargüengoytía et al., 2021	51.27	1.70986	2.66	45	NA	NA	NA	NA	Cabrera et al., 2013	Coordinates georeferenced
Liolaemus_albiceps	Viviparous	Esquerré et al., 2019	Herbivorous	Espinoza et al., 2004; Ocampo et al., 2022	Saxicolous	Ibargüengoytía et al., 2021	62.1	1.79309	7.1	35	-24.339	-66.22	4000	7.22917	Lobo and Laurent, 1995	Coordinates georeferenced
Liolaemus_alticolor	Viviparous	Esquerré et al., 2019	Omnivorous	Espinoza et al., 2004; Ocampo et al., 2022	Saxicolous	Ibargüengoytía et al., 2021	47.79	1.67934	NA	28	NA	NA	NA	NA	Pinchera-Donoso and Tregenza, 2011	NA
Liolaemus_anomalus	Oviparous	Esquerré et al., 2019	Instectivorous	Espinoza et al., 2004; Meiri, 2018	Terrestrial	Abdala and Juárez, 2013	57.5	1.75967	6.9	8	-29.31	-67.36	832	18.1333	Abdala and Juárez, 2013	Coordinates georeferenced
Liolaemus_antumalguen	Viviparous	Esquerré et al., 2019	Omnivorous	Avila et al., 2010	Saxicolous	Avila et al., 2010	95.9	1.98182	6.9	6	-36.65	-70.333	3014	2.1625	Avila et al., 2010	NA
Liolaemus_archeforus	Viviparous	Esquerré et al., 2019	Omnivorous	Espinoza et al., 2004; Meiri, 2018	Saxicolous	Cei and Scolaro, 1982	67	1.82607	6.24	4	-46.964	-71.108	1343	4.4875	Breitman et al., 2013	NA
Liolaemus_atacamensis	Oviparous	Esquerré et al., 2019	Instectivorous	Espinoza et al., 2004; Ocampo et al., 2022	Terrestrial	Reyes-Olivares et al., 2020	61.83	1.7912	NA	26	NA	NA	NA	NA	Pinchera-Donoso and Tregenza, 2011	NA
Liolaemus_audituvelatus	Viviparous	Esquerré et al., 2019	Instectivorous	Espinoza et al., 2004; Meiri, 2018	Terrestrial	Núñez and Yáñez, 1983	58.3	1.76567	NA	1	-22.917	-68.2	2435	13.625	Núñez and Yáñez, 1983	Coordinates georeferenced
Liolaemus_austromendocinus	Viviparous	Esquerré et al., 2019	Instectivorous	Espinoza et al., 2004; Meiri, 2018	Saxicolous	Ibargüengoytía et al., 2021	87	1.93952	NA	32	-35.162	-69.938	1895	8.5125	Cei, 1974	Coordinates georeferenced
Liolaemus_avilai	Viviparous	Esquerré et al., 2019	NA	NA	Terrestrial	Breitman et al., 2011	55.75	1.74624	2.5	4	-47.091	-71.02	1146	5.85	Breitman et al., 2013	NA
Liolaemus_azarai	Oviparous	Esquerré et al., 2019	Instectivorous	Meiri, 2018	Terrestrial	Avila, 2003	48.7	1.68753	2.7	7	-27.835	-57.505	69	21.1583	Avila, 2003	NA
Liolaemus_baguali	Viviparous	Esquerré et al., 2019	Instectivorous	Meiri, 2018	Saxicolous	Ibargüengoytía et al., 2021	77.33	1.88835	6.92	6	-49.23	-71.342	549	7.03333	Breitman et al., 2013	NA
Liolaemus_bellii	Viviparous	Esquerré et al., 2019	Omnivorous	Espinoza et al., 2004; Ocampo et al., 2022	Saxicolous	Ibargüengoytía et al., 2021	72.85	1.86243	NA	82	NA	NA	NA	NA	Pinchera-Donoso and Tregenza, 2011	NA
Liolaemus_bibronii	Oviparous	Esquerré et al., 2019	Instectivorous	Espinoza et al., 2004; Meiri, 2018	Terrestrial	Ibargüengoytía et al., 2021	47.7	1.67852	2.9	NA	-47.785	-65.928	23	9.99583	Quinteros et al., 2020	NA
Liolaemus_bitaeniatus	Oviparous	Esquerré et al., 2019	Instectivorous	Espinoza et al., 2004; Meiri, 2018	Terrestrial	Ibargüengoytía et al., 2021	53.1	1.72509	NA	15	-26.891	-65.696	1900	15.7292	Ramirez-Pinilla, 1995	Coordinates georeferenced
Liolaemus_boulengeri	Oviparous	Esquerré et al., 2019	Instectivorous	Meiri, 2018	Terrestrial	Ibargüengoytía et al., 2021	63.63	1.80366	NA	39	NA	NA	NA	NA	Pinchera-Donoso and Tregenza, 2011	NA
Liolaemus_buergeri	Viviparous	Esquerré et al., 2019	Herbivorous	Espinoza et al., 2004; Meiri, 2018	Saxicolous	Ibargüengoytía et al., 2021	84.25	1.92557	NA	28	-35.204	-70.562	3000	1.47083	Medina et al., 2013	Coordinates georeferenced
Liolaemus_burmeisteri	Viviparous	Esquerré et al., 2019	Instectivorous	Acosta et al., 2020	Saxicolous	Avila et al., 2012	70.75	1.84973	7.33	12	-37.231	-70.373	1037	11.825	Avila et al., 2012	NA
Liolaemus_canqueli	Oviparous	Esquerré et al., 2019	Omnivorous	Meiri, 2018	Terrestrial	Ibargüengoytía et al., 2021	73.32	1.86522	10.9	9	-44.207	-68.232	496	11.0958	Escudero et al., 2012	Coordinates georeferenced
Liolaemus_carlosgarini	Viviparous	Esquerré et al., 2019	NA	NA	Saxicolous	Esquerré et al., 2013	59.83	1.77692	5.52	6	-35.957	-70.568	1867	6.91667	Esquerré et al., 2013	Coordinates georeferenced
Liolaemus_chacabucoense	Viviparous	Esquerré et al., 2019	Instectivorous	Meiri, 2018	Terrestrial	Núñez and Scolaro, 2009	55.05	1.74076	4.97	11	-47.162	-72.089	421	7.52083	Nuñez and Scolaro, 2009	NA
Liolaemus_chacoensis	Oviparous	Esquerré et al., 2019	Instectivorous	Espinoza et al., 2004; Meiri, 2018	Terrestrial	Ibargüengoytía et al., 2021	46.52	1.66764	2.58	32	-30.967	-67.283	706	18.4208	Astudillo, 2018	NA
Liolaemus_chehuachekenk	Oviparous	Esquerré et al., 2019	Omnivorous	Meiri, 2018	Terrestrial	Avila et al., 2008	75.55	1.87823	18.2	12	-42.133	-69.533	1016	8.55833	Escudero et al., 2012	Coordinates georeferenced
Liolaemus_chillanensis	Viviparous	Esquerré et al., 2019	Omnivorous	Espinoza et al., 2004; Meiri, 2018	Saxicolous	Demangel, 2016	75	1.87506	NA	12	NA	NA	NA	NA	Pinchera-Donoso and Tregenza, 2011	NA
Liolaemus_chungara	Viviparous	Esquerré et al., 2019	NA	NA	Terrestrial	Quinteros et al., 2014	49.2	1.69197	2.02	7	-18.271	-69.16	4571	2.56667	Quinteros et al., 2014	NA
Liolaemus_coeruleus	Oviparous	Esquerré et al., 2019	Instectivorous	Espinoza et al., 2004; Meiri, 2018	Saxicolous	Ibargüengoytía et al., 2021	58.2	1.76492	2.8	8	-37.823	-71.111	2098	4.25	Scolaro et al., 2007	NA
Liolaemus_confusus	Oviparous	Esquerré et al., 2019	Instectivorous	Meiri, 2018	Saxicolous	Demangel, 2016	47.6	1.67761	5.2	7	-34.785	-71.553	749	11.6125	Núñez and Pincheira-Donoso, 2006	Coordinates georeferenced
Liolaemus_constanzae	Oviparous	Esquerré et al., 2019	Omnivorous	Espinoza et al., 2004; Ocampo et al., 2022	Terrestrial	Ibargüengoytía et al., 2021	60.58	1.78233	NA	43	NA	NA	NA	NA	Pinchera-Donoso and Tregenza, 2011	NA
Liolaemus_crandalli	Viviparous	Esquerré et al., 2019	Omnivorous	Acosta et al., 2020	Saxicolous	Avila et al., 2015	80.49	1.90574	6.25	11	-37.702	-68.858	1550	9.39583	Avila et al., 2015	NA
Liolaemus_crepuscularis	Viviparous	Esquerré et al., 2019	Omnivorous	Ocampo et al., 2022	Saxicolous	Ibargüengoytía et al., 2021	58.83	1.7696	3.12	7	NA	NA	NA	NA	Cabrera et al., 2013	Coordinates georeferenced
Liolaemus_cristiani	Viviparous	Esquerré et al., 2019	Omnivorous	Meiri, 2018	Saxicolous	Demangel, 2016	71.2	1.85248	6.9	5	-35.617	-71.033	2342	6.25417	Nuñez et al., 1991	NA
Liolaemus_curis	Viviparous	Esquerré et al., 2019	Omnivorous	Acosta et al., 2020	Saxicolous	Ibargüengoytía et al., 2021	86.37	1.93636	NA	23	NA	NA	NA	NA	Pinchera-Donoso and Tregenza, 2011	NA
Liolaemus_cuyanus	Oviparous	Esquerré et al., 2019	Omnivorous	Espinoza et al., 2004; Meiri, 2018	Terrestrial	Ibargüengoytía et al., 2021	72.8	1.86213	1.7	23	-31.817	-67.66	559	19.0583	Cei and Scolaro, 1980	Coordinates georeferenced
Liolaemus_cuyumhue	Oviparous	Esquerré et al., 2019	Instectivorous	Meiri, 2018	Terrestrial	Avila et al., 2009	55.3	1.74273	3.3	7	-38.217	-68.95	259	15.1542	Avila et al., 2009	NA
Liolaemus_darwinii	Oviparous	Esquerré et al., 2019	Instectivorous	Espinoza et al., 2004; Ocampo et al., 2022	Terrestrial	Ibargüengoytía et al., 2021	58.43	1.76664	NA	51	NA	NA	NA	NA	Pinchera-Donoso and Tregenza, 2011	NA
Liolaemus_eleodori	Viviparous	Esquerré et al., 2019	Omnivorous	Espinoza et al., 2004; Meiri, 2018	Terrestrial	Ibargüengoytía et al., 2021	60.71	1.78326	5.09	13	-29.337	-69.405	3255	4.31667	Astullido et al., 2015	NA
Liolaemus_elongatus	Viviparous	Esquerré et al., 2019	Omnivorous	Acosta et al., 2020	Saxicolous	Ibargüengoytía et al., 2021	76	1.88081	NA	35	-36.943	-70.753	1734	7.77083	Cei, 1974	NA
Liolaemus_escarchadosi	Viviparous	Esquerré et al., 2019	Instectivorous	Meiri, 2018	Saxicolous	Ibargüengoytía et al., 2021	81	1.90849	4.99	14	-50.415	-71.495	800	4.80417	Scolaro and Cei, 1997	NA
Liolaemus_espinozai	Oviparous	Cabrera and Scrocchi, 2019	Instectivorous	Cabrera and Scrocchi, 2020	Terrestrial	Ibargüengoytía et al., 2021	55.3	1.74273	5.07	56	-27.118	-66.218	2462	13.9833	Cabrera and Scrocchi, 2019	NA
Liolaemus_fabiani	Viviparous	Esquerré et al., 2019	Omnivorous	Ocampo et al., 2022	Terrestrial	Ibargüengoytía et al., 2021	58.3	1.76567	3.54	2	-22.919	-68.104	2512	13.3875	Yáñez and Núñez, 1983	Coordinates georeferenced
Liolaemus_famatinae	Viviparous	Esquerré et al., 2019	Omnivorous	Espinoza et al., 2004; Meiri, 2018	Saxicolous	Ibargüengoytía et al., 2021	48.9	1.68931	NA	11	-28.918	-67.802	4100	1.15	Cei, 1980	Coordinates georeferenced
Liolaemus_fitzgeraldi	Viviparous	Esquerré et al., 2019	Instectivorous	Espinoza et al., 2004; Meiri, 2018	Saxicolous	Ibargüengoytía et al., 2021	55.47	1.74406	NA	16	NA	NA	NA	NA	Pinchera-Donoso and Tregenza, 2011	NA
Liolaemus_fitzingerii	Oviparous	Esquerré et al., 2019	Omnivorous	Meiri, 2018	Terrestrial	Ibargüengoytía et al., 2021	80.93	1.90811	11.81	50	-49.098	-71.009	351	8.52917	Escudero et al., 2012	Coordinates georeferenced
Liolaemus_flavipiceus	Viviparous	Esquerré et al., 2019	NA	NA	Saxicolous	Cei and Videla, 2003	80.3	1.90472	NA	5	-35.967	-70.367	2500	3.625	Cei and Videla, 2003	Coordinates georeferenced
Liolaemus_frassinettii	Viviparous	Esquerré et al., 2019	NA	NA	Saxicolous	Núñez, 2007	71.13	1.85205	8.7	3	-33.967	-70.967	2281	7.46667	Núñez, 2007	NA
Liolaemus_fuscus	Oviparous	Esquerré et al., 2019	Instectivorous	Espinoza et al., 2004; Meiri, 2018	Saxicolous	Ibargüengoytía et al., 2021	43.9	1.64246	NA	5	-33.583	-70.383	890	14.4	Labra and Bozinovic, 2002	NA
Liolaemus_gallardoi	Viviparous	Esquerré et al., 2019	Omnivorous	Espinoza et al., 2004; Meiri, 2018	Saxicolous	Ibargüengoytía et al., 2021	73.8	1.86806	6.69	15	-47.934	-71.68	915	3.01667	Breitman et al., 2013	NA
Liolaemus_goetschi	Oviparous	Esquerré et al., 2019	Instectivorous	Meiri, 2018	Terrestrial	Ibargüengoytía et al., 2021	55.91	1.74749	6.9	4	-40.082	-66.479	190	15.0208	Escudero et al., 2012	Coordinates georeferenced
Liolaemus_gracilis	Oviparous	Esquerré et al., 2019	Instectivorous	Espinoza et al., 2004; Meiri, 2018	Terrestrial	Ibargüengoytía et al., 2021	48.88	1.68913	3.56	19	-38.339	-57.974	8	14.1333	Vega and Bellagamba, 2005	NA
Liolaemus_grosseorum	Oviparous	Esquerré et al., 2019	Instectivorous	Espinoza et al., 2004; Meiri, 2018	Terrestrial	Ibargüengoytía et al., 2021	49.38	1.69355	1.91	18	NA	NA	NA	NA	Cabrera et al., 2013	NA
Liolaemus_gununakuna	Viviparous	Esquerré et al., 2019	Instectivorous	Meiri, 2018	Saxicolous	Avila et al., 2004	85	1.92942	8	15	-39.1	-69.567	803	11.7375	Avila et al., 2004	NA
Liolaemus_hatcheri	Viviparous	Esquerré et al., 2019	Herbivorous	Espinoza et al., 2004; Ocampo et al., 2022	Terrestrial	Ibargüengoytía et al., 2021	63.33	1.80161	3.83	8	-47.994	-71.68	915	5.74167	Breitman et al., 2013	NA
Liolaemus_heliodermis	Viviparous	Esquerré et al., 2019	Omnivorous	Espinoza et al., 2004; Meiri, 2018	Saxicolous	Robles and Halloy, 2011	82	1.91381	9.6	4	-26.704	-65.8	2860	11.1125	Robles and Halloy, 2011	NA
Liolaemus_huacahuasicus	Viviparous	Esquerré et al., 2019	Herbivorous	Espinoza et al., 2004; Ocampo et al., 2022	Saxicolous	Ibargüengoytía et al., 2021	58.13	1.7644	5.38	41	-26.661	-65.741	4300	4.37083	Ramirez-Pinilla, 1991	Coordinates georeferenced
Liolaemus_insolitus	Viviparous	Esquerré et al., 2019	Instectivorous	Espinoza et al., 2004; Meiri, 2018	Terrestrial	Cei and Pefaur, 1982	61	1.78533	3.46	3	-17.022	-71.995	123	19.7375	Cei and Pefaur, 1982	Coordinates georeferenced
Liolaemus_irregularis	Viviparous	Esquerré et al., 2019	Omnivorous	Espinoza et al., 2004; Meiri, 2018	Saxicolous	Ibargüengoytía et al., 2021	69.512	1.84206	6.813	5	-24.247	-66.344	3794	8.175	Valdecantos et al., 2007	NA
Liolaemus_isabelae	Viviparous	Esquerré et al., 2019	Instectivorous	Espinoza et al., 2004; Meiri, 2018	Saxicolous	Navarro and Nuñez, 1993	69.47	1.8418	3.68	3	-26.45	-69.05	3556	7.50833	Navarro and Núñez, 1993	NA
Liolaemus_kingii	Viviparous	Esquerré et al., 2019	Omnivorous	Espinoza et al., 2004; Meiri, 2018	Terrestrial	Ibargüengoytía et al., 2021	71.8	1.85612	5.67	10	-47.717	-65.841	16	10.0625	Breitman et al., 2013	NA
Liolaemus_kolengh	Viviparous	Esquerré et al., 2019	Instectivorous	Meiri, 2018	Saxicolous	Ibargüengoytía et al., 2021	54.94	1.73989	4.21	12	-47.021	-71.809	1488	2.57917	Breitman et al., 2013	NA
Liolaemus_koslowskyi	Oviparous	Esquerré et al., 2019	Instectivorous	Espinoza et al., 2004; Meiri, 2018	Terrestrial	Ibargüengoytía et al., 2021	55.48	1.74414	4.08	413	-28.817	-66.95	1416	16.6833	Martori and Aun, 2010	NA
Liolaemus_kriegi	Viviparous	Esquerré et al., 2019	Omnivorous	Espinoza et al., 2004; Meiri, 2018	Saxicolous	Ibargüengoytía et al., 2021	99.75	1.99891	NA	20	NA	NA	NA	NA	Pinchera-Donoso and Tregenza, 2011	NA
Liolaemus_laurenti	Oviparous	Esquerré et al., 2019	Omnivorous	Meiri, 2018	Terrestrial	Ibargüengoytía et al., 2021	52.11	1.71692	2.66	38	NA	NA	NA	NA	Cabrera et al., 2013	NA
Liolaemus_lavillai	Viviparous	Esquerré et al., 2019	Omnivorous	Meiri, 2018	Terrestrial	Ibargüengoytía et al., 2021	57.2	1.7574	2.51	20	NA	NA	NA	NA	Cabrera et al., 2013	NA
Liolaemus_leftrarui	Viviparous	Esquerré et al., 2019	Instectivorous	Meiri, 2018	Saxicolous	Troncoso-Palacios et al., 2016a	64.35	1.80855	NA	4	-38.2	-71.733	1405	6.42083	Troncoso-Palacios et al., 2016a	NA
Liolaemus_lemniscatus	Oviparous	Esquerré et al., 2019	Instectivorous	Espinoza et al., 2004; Ocampo et al., 2022	Terrestrial	Ibargüengoytía et al., 2021	47.83	1.6797	NA	80	NA	NA	NA	NA	Pinchera-Donoso and Tregenza, 2011	NA
Liolaemus_leopardinus	Viviparous	Esquerré et al., 2019	Omnivorous	Espinoza et al., 2004; Ocampo et al., 2022	Saxicolous	Ibargüengoytía et al., 2021	99.6	1.99826	1.34	5	-33.253	-70.287	2760	3.04167	Santoyo-Brito et al., 2018	NA
Liolaemus_lineomaculatus	Viviparous	Esquerré et al., 2019	Omnivorous	Ocampo et al., 2022	Terrestrial	Ibargüengoytía et al., 2021	56.75	1.75397	1.89	4	-47.717	-65.841	16	10.0625	Breitman et al., 2013	NA
Liolaemus_lonquimayensis	Viviparous	Esquerré et al., 2019	Instectivorous	Meiri, 2018	Saxicolous	Escobar Huerta et al., 2015	68.85	1.8379	0.78	2	-38.389	-71.63	1758	5.17917	Escobar Huerta et al., 2015	Coordinates georeferenced
Liolaemus_lutzae	Oviparous	Esquerré et al., 2019	Omnivorous	Espinoza et al., 2004; Ocampo et al., 2022	Terrestrial	Ibargüengoytía et al., 2021	59.9	1.77743	3.7	160	-22.958	-42.903	1	23.1458	Duarte-Rocha, 1996	NA
Liolaemus_magellanicus	Viviparous	Esquerré et al., 2019	Omnivorous	Espinoza et al., 2004; Meiri, 2018	Terrestrial	Ibargüengoytía et al., 2021	54.75	1.73838	6.65	4	-52.251	-68.431	41	6.72083	Breitman et al., 2013	NA
Liolaemus_maldonadae	Viviparous	Esquerré et al., 2019	Instectivorous	Espinoza et al., 2004; Meiri, 2018	Saxicolous	Nuñez et al., 1991	66.7	1.82413	6.1	2	-30.43	-70.39	3760	-0.725	Nuñez et al., 1991	NA
Liolaemus_martorii	Oviparous	Esquerré et al., 2019	Instectivorous	Meiri, 2018	Terrestrial	Ibargüengoytía et al., 2021	64.74	1.81117	2.31	7	-40.832	-65.12	25	15.0833	Escudero et al., 2012	Coordinates georeferenced
Liolaemus_melanops	Oviparous	Esquerré et al., 2019	Omnivorous	Meiri, 2018	Terrestrial	Ibargüengoytía et al., 2021	71.8	1.85612	5.2	29	-42.733	-66.983	140	13.8417	Frutos et al., 2007	NA
Liolaemus_monticola	Oviparous	Esquerré et al., 2019	Instectivorous	Ocampo et al., 2022	Saxicolous	Ibargüengoytía et al., 2021	57.1	1.75664	NA	7	-33.583	-70.383	890	14.4	Labra and Bozinovic, 2002	NA
Liolaemus_morandae	Viviparous	Esquerré et al., 2019	NA	NA	Terrestrial	Breitman et al., 2011	57	1.75587	4.24	NA	-45.967	-68.2	755	9.09583	Breitman et al., 2011	NA
Liolaemus_morenoi	Oviparous	Esquerré et al., 2019	Omnivorous	Meiri, 2018	Terrestrial	Ibargüengoytía et al., 2021	65.73	1.81776	2.78	4	-40.065	-70.135	570	11.4917	Escudero et al., 2012	Coordinates georeferenced
Liolaemus_multicolor	Viviparous	Esquerré et al., 2019	Omnivorous	Meiri, 2018	Terrestrial	Ibargüengoytía et al., 2021	63.51	1.80284	4.71	21	-24.309	-66.152	3994	7.4625	Valdecantos et al., 2007	NA
Liolaemus_multimaculatus	Oviparous	Esquerré et al., 2019	Instectivorous	Espinoza et al., 2004; Meiri, 2018	Terrestrial	Ibargüengoytía et al., 2021	54.6	1.73719	3.97	29	-38.365	-58.037	12	14.1125	Vega 1997	NA
Liolaemus_neuquensis	Viviparous	Esquerré et al., 2019	Omnivorous	Espinoza et al., 2004; Meiri, 2018	Saxicolous	Videla and Cei, 1996	58.2	1.76492	1.9	17	-37.881	-71.052	1615	6.7375	Scolaro et al., 2007	NA
Liolaemus_nigromaculatus	Oviparous	Esquerré et al., 2019	Omnivorous	Ocampo et al., 2022	Terrestrial	Ibargüengoytía et al., 2021	67.4	1.82866	7.2	16	-27.274	-70.466	335	15.5	Troncoso-Palacios and Garin, 2013	NA
Liolaemus_nigroviridis	Viviparous	Esquerré et al., 2019	Omnivorous	Espinoza et al., 2004; Ocampo et al., 2022	Saxicolous	Ibargüengoytía et al., 2021	63.81	1.80489	NA	85	NA	NA	NA	NA	Pinchera-Donoso and Tregenza, 2011	NA
Liolaemus_nitidus	Oviparous	Esquerré et al., 2019	Omnivorous	Espinoza et al., 2004; Ocampo et al., 2022	Saxicolous	Ibargüengoytía et al., 2021	74.24	1.87064	NA	10	-33.484	-71.636	35	16.15	Troncoso-Palacios and Labra, 2012	NA
Liolaemus_occipitalis	Oviparous	Esquerré et al., 2019	Omnivorous	Meiri, 2018	Terrestrial	Ibargüengoytía et al., 2021	53.18	1.72575	3.49	32	-30.086	-50.189	13	19.2125	Verrastro 2004	NA
Liolaemus_olongasta	Oviparous	Esquerré et al., 2019	Omnivorous	Espinoza et al., 2004; Meiri, 2018	Terrestrial	Ibargüengoytía et al., 2021	52.2	1.71767	0.29	24	-31.35	-68.476	663	17.8042	Cánovas et al., 2006b	Coordinates georeferenced
Liolaemus_ornatus	Viviparous	Esquerré et al., 2019	Omnivorous	Espinoza et al., 2004; Meiri, 2018	Terrestrial	Ibargüengoytía et al., 2021	62.36	1.79491	2.53	30	NA	NA	NA	NA	Cabrera et al., 2013	NA
Liolaemus_pagaburoi	Viviparous	Esquerré et al., 2019	Omnivorous	Espinoza et al., 2004; Meiri, 2018	Terrestrial	Lobo and Espinoza, 1999	49.7	1.69636	4.4	16	-26.733	-65.75	3042	9.77917	Lobo and Espinoza, 1999	NA
Liolaemus_parvus	Viviparous	Esquerré et al., 2019	Instectivorous	Castillo et al., 2019	Saxicolous	Ibargüengoytía et al., 2021	56.83	1.75458	5.13	18	-30.95	-60.08	3166	19.2917	Gómez-Alés, et al., 2017	NA
Liolaemus_petrophilus	Viviparous	Esquerré et al., 2019	Instectivorous	Meiri, 2018	Saxicolous	Ibargüengoytía et al., 2021	78.46	1.89465	NA	7	-42.638	-70.212	456	10.9125	Vanhooydonck et al., 2010	NA
Liolaemus_poecilochromis	Viviparous	Esquerré et al., 2019	Herbivorous	Meiri, 2018	Terrestrial	Ibargüengoytía et al., 2021	63.4	1.80209	4	20	-25.492	-67.113	3986	6.95	Valdecantos et al., 2012	NA
Liolaemus_polystictus	Viviparous	Esquerré et al., 2019	Herbivorous	Olivera and Aguilar, 2020	Saxicolous	Olivera and Aguilar, 2020	62.37	1.79498	5.66	23	-13.335	-74.949	4321	5.225	Olivera and Aguilar, 2020	NA
Liolaemus_pseudoanomalus	Oviparous	Esquerré et al., 2019	Instectivorous	Espinoza et al., 2004; Meiri, 2018	Saxicolous	Villavicencio et al., 2007	51.3	1.71012	9.92	39	-31.35	-68.468	649	17.8583	Villavicencio et al., 2003	NA
Liolaemus_pseudolemniscatus	Oviparous	Esquerré et al., 2019	Instectivorous	Espinoza et al., 2004; Meiri, 2018	Terrestrial	Ibargüengoytía et al., 2021	46	1.66276	3.1	10	-31.483	-70.95	1600	10.5458	Lamborot and Ortiz, 1990	NA
Liolaemus_puna	Viviparous	Esquerré et al., 2019	Omnivorous	Espinoza et al., 2004; Ocampo et al., 2022	Saxicolous	Ibargüengoytía et al., 2021	45.2	1.65514	NA	14	NA	NA	NA	NA	Pinchera-Donoso and Tregenza, 2011	NA
Liolaemus_punmahuida	Viviparous	Esquerré et al., 2019	Omnivorous	Meiri, 2018	Saxicolous	Avila et al., 2003	86.2	1.93551	4.3	4	-37.136	-70.072	3000	1.92917	Avila et al., 2003	NA
Liolaemus_quilmes	Oviparous	Esquerré et al., 2019	Instectivorous	Espinoza et al., 2004; Meiri, 2018	Terrestrial	Ibargüengoytía et al., 2021	57.2	1.7574	3.7	35	-26.651	-65.815	2700	12.0042	Halloy and Robles, 2002	Coordinates georeferenced
Liolaemus_ramirezae	Oviparous	Esquerré et al., 2019	Omnivorous	Meiri, 2018	Saxicolous	Ibargüengoytía et al., 2021	51.3	1.71012	2.6	18	-26.68	-65.812	2820	11.6833	Lobo and Espinoza, 1999	NA
Liolaemus_riojanus	Oviparous	Esquerré et al., 2019	Instectivorous	Espinoza et al., 2004; Meiri, 2018	Terrestrial	Ibargüengoytía et al., 2021	52.3	1.7185	2.06	13	-31.84	-67.869	638	18.45	Laispur et al., 2006	NA
Liolaemus_rothi	Oviparous	Esquerré et al., 2019	Instectivorous	Meiri, 2018	Terrestrial	Ibargüengoytía et al., 2021	93	1.96848	NA	24	NA	NA	NA	NA	Pinchera-Donoso and Tregenza, 2011	NA
Liolaemus_ruibali	Viviparous	Esquerré et al., 2019	Omnivorous	Espinoza et al., 2004; Meiri, 2018	Saxicolous	Ibargüengoytía et al., 2021	57.4	1.75891	2.5	7	NA	NA	NA	5.075	Cánovas et al., 2014	NA
Liolaemus_sagei	Oviparous	Esquerré et al., 2019	Instectivorous	Meiri, 2018	Saxicolous	Etheridge and Christie, 2003	75	1.87506	NA	2	-38.917	-70.133	1065	10.2917	Etheridge and Christie, 2003	Coordinates georeferenced
Liolaemus_salinicola	Oviparous	Esquerré et al., 2019	Instectivorous	Espinoza et al., 2004; Meiri, 2018	Terrestrial	Ibargüengoytía et al., 2021	58.19	1.76485	3.19	21	NA	NA	NA	NA	Cabrera et al., 2013	NA
Liolaemus_sarmientoi	Viviparous	Esquerré et al., 2019	Omnivorous	Espinoza et al., 2004; Meiri, 2018	Saxicolous	Ibargüengoytía et al., 2021	75.75	1.87938	7.09	4	-52.075	-69.581	137	6.69583	Breitman et al., 2013	NA
Liolaemus_saxatilis	Oviparous	Esquerré et al., 2019	Instectivorous	Espinoza et al., 2004; Meiri, 2018	Saxicolous	Avila et al., 1992	53.73	1.73022	5.64	10	-33	-64.9	1000	15.025	Avila et al., 1992	NA
Liolaemus_scapularis	Oviparous	Esquerré et al., 2019	Instectivorous	Espinoza et al., 2004; Meiri, 2018	Terrestrial	Ibargüengoytía et al., 2021	59.9	1.77743	NA	43	-26.063	-65.902	1562	17.4083	Ramirez-Pinilla, 1994	Coordinates georeferenced
Liolaemus_scorialis	Viviparous	Esquerré et al., 2019	Omnivorous	Meiri, 2018	Saxicolous	Troncoso-Palacios et al., 2015	63.65	1.8038	NA	7	-37.35	-71.38	1450	6.03333	Troncoso-Palacios et al., 2015	NA
Liolaemus_signifer	Viviparous	Esquerré et al., 2019	Omnivorous	Espinoza et al., 2004; Ocampo et al., 2022	Terrestrial	Ibargüengoytía et al., 2021	89.3	1.95085	NA	12	NA	NA	NA	NA	Pinchera-Donoso and Tregenza, 2011	NA
Liolaemus_silvai	Oviparous	Esquerré et al., 2019	Instectivorous	Espinoza et al., 2004; Meiri, 2018	Saxicolous	Ortiz, 1989	61.1	1.78604	1.2	2	-29.1	-71.417	95	15.5333	Troncoso-Palacios et al., 2015b	Coordinates georeferenced
Liolaemus_sitesi	Oviparous	Esquerré et al., 2019	Omnivorous	Meiri, 2018	Saxicolous	Avila et al., 2013	66.36	1.82191	5.25	11	-37.7	-68.85	1560	9.6	Avila et al., 2013	NA
Liolaemus_somuncurae	Viviparous	Esquerré et al., 2019	Instectivorous	Meiri, 2018	Terrestrial	Cei and Scolaro, 1981	78.33	1.89393	7.89	6	-41.395	-66.959	1417	7.69583	Breitman et al., 2013	NA
Liolaemus_talampaya	Viviparous	Esquerré et al., 2019	NA	NA	Saxicolous	Avila et al., 2004	74	1.86923	2.6	3	-29.73	-67.75	1200	14.4958	Avila et al., 2004	NA
Liolaemus_tari	Viviparous	Esquerré et al., 2019	Instectivorous	Espinoza et al., 2004; Meiri, 2018	Saxicolous	Scolaro and Cei, 1997	84	1.92428	10.6	7	-49.32	-72.186	1225	3.2375	Scolaro and Cei, 1997	NA
Liolaemus_thermarum	Viviparous	Esquerré et al., 2019	Instectivorous	Espinoza et al., 2004; Meiri, 2018	Saxicolous	Videla and Cei, 1996	77.25	1.8879	9.5	2	-35.3	-70.606	2500	3.2	Videla and Cei, 1996	Coordinates georeferenced
Liolaemus_torresi	Viviparous	Esquerré et al., 2019	Instectivorous	Meiri, 2018	Terrestrial	Núñez et al., 2003	59.15	1.77195	3.7	4	-22.383	-68.867	2430	12.7208	Núñez et al., 2003	NA
Liolaemus_tregenzai	Viviparous	Esquerré et al., 2019	Herbivorous	Ocampo et al., 2022	Saxicolous	Pincheira-Donoso and Scolaro, 2007	71.41	1.85376	6.02	5	-37.83	-71.1	2150	4.87083	Pincheira-Donoso and Scolaro, 2007	NA
Liolaemus_tristis	Viviparous	Esquerré et al., 2019	Instectivorous	Espinoza et al., 2004; Meiri, 2018	Saxicolous	Scolaro and Cei, 1997	72.9	1.86273	3.1	11	-47	-69.333	862	8.62083	Scolaro and Cei, 1997	NA
Liolaemus_tulkas	Viviparous	Esquerré et al., 2019	NA	NA	Saxicolous	Quinteros et al., 2008	65.8	1.81823	4.1	4	-27.72	-67.976	2825	10.8167	Quinteros et al., 2008	NA
Liolaemus_ubaghsi	Viviparous	Esquerré et al., 2019	NA	NA	Saxicolous	Esquerré et al., 2014	82.3	1.9154	9.1	7	-34.059	-70.435	2210	8.3	Esquerré et al., 2014	NA
Liolaemus_uniformis	Viviparous	Esquerré et al., 2019	Omnivorous	Meiri, 2018	Saxicolous	Troncoso-Palacios et al., 2016b	70.4	1.84757	NA	3	-32.25	-70.5	3147	1.58333	Troncoso-Palacios et al., 2016b	NA
Liolaemus_uptoni	Viviparous	Esquerré et al., 2019	Instectivorous	Meiri, 2018	Terrestrial	Scolaro and Cei, 2006	66.25	1.82119	0.96	4	-42.392	-68.933	1269	7.22917	Breitman et al., 2013	NA
Liolaemus_uspallatensis	Oviparous	Esquerré et al., 2019	Instectivorous	Espinoza et al., 2004; Meiri, 2018	Terrestrial	Ibargüengoytía et al., 2021	58.5	1.76716	3.54	13	NA	NA	NA	NA	Cabrera et al., 2013	NA
Liolaemus_valdesianus	Viviparous	Esquerré et al., 2019	Omnivorous	Espinoza et al., 2004; Ocampo et al., 2022	Saxicolous	Demangel, 2016	89.08	1.94978	NA	20	NA	NA	NA	NA	Pinchera-Donoso and Tregenza, 2011	NA
Liolaemus_vallecurensis	Viviparous	Esquerré et al., 2019	Omnivorous	Espinoza et al., 2004; Meiri, 2018	Saxicolous	Ibargüengoytía et al., 2021	53.8	1.73078	7.9	18	-29.317	-69.5	3489	5.24583	Castillo et al., 2017	NA
Liolaemus_wiegmannii	Oviparous	Esquerré et al., 2019	Instectivorous	Espinoza et al., 2004; Meiri, 2018	Terrestrial	Ibargüengoytía et al., 2021	48.68	1.68735	2.79	13	NA	NA	NA	NA	Cabrera et al., 2013	NA
Liolaemus_xanthoviridis	Viviparous	Esquerré et al., 2019	Omnivorous	Meiri, 2018	Terrestrial	Ibargüengoytía et al., 2021	75	1.87506	5.1	9	-43.907	-65.412	197	12.3083	Cei and Scolaro, 1980	Coordinates georeferenced
Liolaemus_zabalai	Viviparous	Esquerré et al., 2019	Omnivorous	Ocampo et al., 2022	Saxicolous	Troncoso-Palacios et al., 2015	81	1.90849	NA	3	-37.517	-71.25	1450	7.51667	Troncoso-Palacios et al., 2015	NA
Liolaemus_zapallarensis	Oviparous	Esquerré et al., 2019	Omnivorous	Ocampo et al., 2022	Terrestrial	Demangel, 2016	82.8	1.91803	NA	32	NA	NA	NA	NA	Pinchera-Donoso and Tregenza, 2011	NA
Liolaemus_zullyae	Viviparous	Esquerré et al., 2019	Instectivorous	Meiri, 2018	Saxicolous	Ibargüengoytía et al., 2021	65.3	1.81491	NA	4	-46.846	-71.871	835	5.71667	Cei and Scolaro, 1996	Coordinates georeferenced

## Sheet: References
References
Abdala, C.S., Juárez Heredia, V.I., 2013. Taxonomía y filogenia de un grupo de lagartos amenazados: El grupo de Liolaemus anomalus (Iguania: Liolaemidae). Cuadernos de herpetología 27, 109–153.
Acosta, J.C., Gómez Alés, R., Blanco, G., Escudero, P.C., Avila, L.J., 2020. General ecology of Patagonian lizards, in: Morando, M., Avila, L.J. (Eds.), Lizards of Patagonia, Diversity, Systematics, Biogeography and Biology of the Reptiles at the End of the World, Natural and Social Sciences of Patagonia. Springer Nature Switzerland, Cham, Switzerland, pp. 293–334.
Astudillo, G. V., Acosta, J.C., Villavicencio, H.J., Córdoba, M.A., 2015. Ecología trófica y dimorfismo sexual del lagarto endémico Liolaemus eleodori (Iguania: Liolaemidae) del Parque Nacional San Guillermo, San Juan. Cuadernos de Herpetología 29, 00–00.
Astullido, G.V., 2018. Evaluación de la flexibilidad en la fisiología térmica y desemepeño locomotor en Liolaemus chacoensis (Squamata: Liolaemidae) en el Chaco de San Juan. Universidad Nacional de Cuyo, Mendoza, Argentina.
Avila, L.J., 2003. A new species of Liolaemus (Squamata: Liolaemidae) from northeastern Argentina and southern Paraguay. Herpetologica 59, 283–292.
Avila, L.J., Cei, J.M., Martori, R.A., Acosta, J.C., 1992. A new species of Liolaemus of the bibroni group from granitic ravines of Achiras, Sierra de Comechingones, Córdoba, Argentina (Reptilia: Tropiduridae). Boll. Mus. reg. Sci. nat. Torino 31, 101–111.
Avila, L.J., Fulvio Perez, C.H., Medina, C.D., Sites, J.W., Morando, M., 2012. A new species of lizard of the Liolaemus elongatus clade (Reptilia: Iguania: Liolaemini) from Curi Leuvu River Valley, northern Patagonia, Neuquén, Argentina. Zootaxa 3325, 37–52.
Avila, L.J., Medina, C.D., Fulvio Perez, C.H., Sites, J.W., Morando, M., 2015. Molecular phylogenetic relationships of the lizard clade Liolaemus elongatus (Iguania: Liolaemini) with the description of a new species from an isolated volcanic peak in northern Patagonia. Zootaxa 3947, 67–84–67–84. https://doi.org/10.11646/ZOOTAXA.3947.1.4
Avila, L.J., Morando, M., Perez, C.H.F., Sites, J.W., 2004. Phylogenetic relationships of lizards of the Liolaemus petrophilus group (Squamata, Liolaemidae), with description of two new species from western Argentina. Herpetologica 60, 187–203.
Avila, L.J., Morando, M., Perez, D.R., Sites, J.W., 2009. A new species of Liolaemus from Añelo sand dunes, northern Patagonia, Neuquén, Argentina, and molecular phylogenetic relationships of the Liolaemus wiegmannii species group (Squamata, Iguania, Liolaemini). Zootaxa 2234, 39–55–39–55.
Avila, L.J., Morando, M., Perez, D.R., Sites, J.W., 2010. A new species of the Liolaemus elongatus clade (Reptilia: Iguania: Liolaemini) from Cordillera del Viento, northwestern Patagonia, Neuquén, Argentina. Zootaxa 2667, 28–42–28–42.
Avila, L.J., Morando, M., Sites, J.W., 2008. New species of the iguanian lizard genus Liolaemus (Squamata, Iguania, Liolaemini) from central Patagonia, Argentina. J Herpetol 42, 186–196.
Avila, L.J., Olave, M., Fulvio Perez, C.H., Perez, D.R., Morando, M., 2013. Molecular phylogenetic relationships of the Liolaemus rothi complex and a new species of lizard from Auca Mahuida Volcano (Squamata: Liolaemini). Zootaxa 3608, 221–238–221–238.
Avila, L.J., Perez, C.H.F., Morando, M., 2003. A new species of Liolaemus (Squamata: Iguania: Liolaemidae) from northwestern Patagonia (Neuquén, Argentina). Herpetologica 59, 532–543.
Breitman, M.F., Morando, M., Avila, L.J., 2013. Past and present taxonomy of the Liolaemus lineomaculatus section (Liolaemidae): is the morphological arrangement hypothesis valid? Zool J Linn Soc 168, 612–668.
Breitman, M.F., Parra, M., Fulvio Pérez, C.H., Sites, J.W., 2011. Two new species of lizards from the Liolaemus lineomaculatus section (Squamata: Iguania: Liolaemidae) from southern Patagonia. Zootaxa 3120, 1–28.
Bujes, C.S., Verrastro, L., 2006. Thermal biology of Liolaemus occipitalis (Squamata, Tropiduridae) in the coastal sand dunes of Rio Grande do Sul, Brazil. Brazilian Journal of Biology 66, 945–954.
Cabrera, M.P., Scrocchi Manfrini, G.J., 2020. Ecología trófica de Liolaemus espinozai Abdala, 2005 (Sauria: Liolaemidae) en Campo El Arenal, Catamarca, Argentina. Cuadernos de Herpetología 34, 17–31.
Cabrera, M.P., Scrocchi, G.J., 2019. Reproducción y ciclo de cuerpos grasos de Liolaemus espinozai Abdala, 2005 (Sauria: Liolaemidae) en Campo El Arenal, Catamarca, Argentina. Revista del Museo Argentino de Ciencias Naturales 21, 169–178.
Cabrera, M.P., Scrocchi, G.J., Cruz, F.B., 2013. Sexual size dimorphism and allometry in Liolaemus of the L. laurenti group (Sauria: Liolaemidae): Morphologic lability in a clade of lizards with different reproductive modes. Zoologischer Anzeiger - A Journal of Comparative Zoology 252, 299–306.
Cánovas, M.G., Acosta, J.C., Villavicencio, H.J., Marinero, A.J., 2006b. Dimorfismo sexual y morfometría de una población de Liolaemus olongasta (Iguania: Liolaemidae) en La Laja, Albardón, San Juan, República Argentina. Cuadernos de Herpetología 19, 57–61.
Cánovas, M.G., Acosta, J.C., Villavicencio, H.J., Marinero, J.A., 2006a. Liolaemus olongasta. Body temperature. Herpetol Rev 37, 87–88.
Cánovas, M.G., Villavicencio, H.J., Blanco Fager, R.V., Marinero, J., Borghi, C.E., 2014. Primeros datos de la biología reproductiva de hembras del lagarto Liolaemus ruibali en la Puna sanjuanina, Argentina. Fundación de Historia Natural Felix de Azara 159, 1–3.
Castillo Gabriel, N., Villavicencio, H.J., Acosta, J.C., Marinero, J., 2015. Temperatura corporal de campo y actividad temporal de las lagartijas Liolaemus vallecurensis y Liolaemus ruibali en clima riguroso de los Andes centrales de Argentina. Multequina 24, 19–31.
Castillo, G.N., Acosta, J.C., Blanco, G.M., 2019. Trophic analysis and parasitological aspects of Liolaemus parvus (Iguania: Liolaemidae) in the Central Andes of Argentina. Turkish Journal of Zoology 43, 277–286.
Castillo, G.N., Villavicencio Martin, H.J., Acosta, J.C., Marinero, J.A., 2017. Ecología trófica, dimorfismo sexual y parámetros reproductivos en el lagarto endémico Andino Liolaemus vallecurensis, Argentina. Iheringia Ser Zool 107, e2017046.
Cei, J.M., 1974. Revision of the Patagonian iguanids of the Liolaemus elongatus complex. J Herpetol 8, 229.
Cei, J.M., 1980. New endemic iguanid lizards from the Famatina Mountains of western Argentina. J Herpetol 14, 57-64.
Cei, J.M., Péfaur, J.E., 1980. Una nueva especie de Liolaemus (Iguanidae: Squamata): su sistemática, ecología y distribución, in: Zoología Neotropical: Actas Del VIII Congreso Latinoamericano de Zoología. pp. 573–586.
Cei, J.M., Scolaro, J.A., 1980. Two new subspecies of the Liolaemus fitzingeri complex from Argentina. J Herpetol 14, 37–43.
Cei, J.M., Scolaro, J.A., 1981. A new northern subspecies of Liolaemus kingi in Argentina. J Herpetol 15, 207–210.
Cei, J.M., Scolaro, J.A., 1982. Un nuevo iguanido tropidurino del genero Liolaemus, grupo kingi-archeforus, de la región del Lago Belgrano, Santa Cruz, Argentina. Revista de la Universidad Nacional de Río Cuarto 2, 257–265.
Cei, J.M., Scolaro, J.A., 1996. A new species of Liolaemus of the archeforus group from the precordilleran valley of the Zeballos river, Santa Cruz Province, Argentina (Reptilia, Tropiduridae). Boll. Mus. reg. Sci. nat. Torino 14, 389–401.
Cei, J.M., Videla, F., 2003. A new species of Liolaemus lacking precloacal pores in males from the Andean south-eastern mountains of Mendoza Province, Argentina (Liolaemidae, Iguania, Lacertilia, Reptilia). Bollettino. Museo Regionale di Scienze Naturali 20, 275–290.
Demangel, D., 2016. Reptiles del centro sur de Chile. Corporación Chilena de la Madera, Concepción, Chile.
Duarte Rocha, C.F., 1996. Sexual dimorphism in the sand lizard Liolaemus lutzae of southeastern Brazil, in: Peafur, J.E. (Ed.), Herpetología Neotropical . Consejo de Publicaciones - Universidad de Los Andes, Merida, Venezuela, pp. 131–140.
Escobar Huerta, G., Santibáñez Toro, J., Ortiz, J.C., 2015. Liolaemus lonquimayensis (Squamata: Liolaemidae), a new lizard species for chile without precloacal pores. Gayana 79, 94–101.
Escudero, P.C., Minoli, I., Frutos, N., Avila, L.J., Morando, M., 2012. Estudio comparativo del melanismo en lagartijas del grupo Liolaemus fitzingerii (Liolaemini: Liolaemus). Cuadernos de herpetología 26, 79–89.
Espinoza, R.E., Wiens, J.J., Tracy, C.R., 2004. Recurrent evolution of herbivory in small, cold-climate lizards: Breaking the ecophysiological rules of reptilian herbivory. Proc Natl Acad Sci U S A 101, 16819–16824.
Esquerré, D., Brennan, I.G., Catullo, R.A., Torres‐Pérez, F., Keogh, J.S., 2019. How mountains shape biodiversity: The role of the Andes in biogeography, diversification, and reproductive biology in South America’s most species‐rich lizard radiation (Squamata: Liolaemidae). Evolution 73, 214–230.
Esquerré, D., Núñez, H., Scolaro, J.A., 2013. Liolaemus carlosgarini and Liolaemus riodamas (Squamata: Liolaemidae), two new species of lizards lacking precloacal pores, from Andean areas of central Chile. Zootaxa 3619, 428–452.
Esquerré, D., Troncoso-Palacios, J., Garín, C.F., Núnez, H., 2014. The missing leopard lizard: Liolaemus ubaghsi sp. nov., a new species of the leopardinus clade (Reptilia: Squamata: Liolaemidae) from the Andes of the O’Higgins Region in Chile. Zootaxa 3815, 507–525.
Etheridge, R., Christie, M.I., 2003. Two new species of the lizard genus Liolaemus (Squamata: Liolaemidae) from northern Patagonia, with comments on Liolaemus rothi. J Herpetol 37, 325–341.
Ferri Yáñez, F., 2016. Evolución del nicho térmico en lagartos del género Liolaemus e Ibéricos. Universidad de Alicante, Alicante, España.
Frutos, N., Camporro, L.A., Avila, L.J., 2007. Ambito de hogar de Liolaemus melanops Burmeister, 1888 (Squamata: Liolaemini) en el centro de Chubut, Argentina. Gayana 71, 142–149.
Gómez Alés, R., Acosta, J.C., Laspiur, A., 2017. Thermal biology in two syntopic lizards, Phymaturus extrilidus and Liolaemus parvus, in the Puna region of Argentina. J Therm Biol 68, 73–82.
Halloy, M., Robles, C., 2002. Spatial distribution in a neotropical lizard, Liolaemus quilmes (Liolaemidae): site fidelity and overlaping among males and females. Bulletin of the Maryland Herpetological Society 38, 118–129.
Ibargüengoytía, N.R., Cussac, V.E., 2002. Body temperatures of two viviparous Liolaemus lizard species, in Patagonian rain forest and steppe. Herpetological Journal 12, 131–134.
Ibargüengoytía, N.R., Marlin Medina, S., Fernández, J.B., Gutiérrez, J.A., Tappari, F., Scolaro, A., 2010. Thermal biology of the southernmost lizards in the world: Liolaemus sarmientoi and Liolaemus magellanicus from Patagonia, Argentina. J Therm Biol 35, 21–27.
Ibargüengoytía, N.R., Medina, M., Laspiur, A., Qu, Y.F., Peralta, C.A.R., Sinervo, B., Miles, D.B., 2021. Looking at the past to infer into the future: Thermal traits track environmental change in Liolaemidae*. Evolution 75, 2348–2370.
Labra, A., 1998. Selected body temperatures of seven species of Chilean Liolaemus lizards. Revista Chilena de Historia Natural 71, 349–358.
Labra, A., Bozinovic, F., 2002. Interplay between pregnancy and physiological thermoregulation in Liolaemus lizards. Écoscience 9, 421–426.
Labra, A., Pienaar, J., Hansen, T.F., 2009. Evolution of thermal physiology in Liolaemus lizards: Adaptation, phylogenetic inertia, and niche tracking. American Naturalist 174, 204–220.
Labra, A., Soto-Gamboa, M., Bozinovic, F., 2001. Behavioral and physiological thermoregulation of Atacama desert-dwelling Lioleamus lizards. Écoscience 8, 413–420.
Lamborot, M., Ortiz, J.C., 1990. Liolaemus pseudolemniscatus, una nueva especie de lagarto del Norte Chico de Chile (Sauria: Tropiduridae). Gayana 54, 135–142.
Laspiur, A., Ripoll, Y., Acosta, J.C., 2006. Dimorfismo sexual de Liolaemus riojanus (Iguania: Liolaemide) en una población de un desierto arenoso del Monte de San Juan, Argentina. Rev Esp Herpetol 20, 87–94.
Laspiur, A., Villavicencio, H.J., Acosta, J.C., 2007. Liolaemus chacoensis. Body temperature. Herpetol Rev 38, 458–459.
Lobo, F., Espinoza, R.E., 1999. Two new cryptic species of Liolaemus (Iguania: Tropiduridae) from northwestern Argentina: Resolution of the purported reproductive bimodality of Liolaemus alticolor. Copeia 122–140.
Lobo, F., Laurent, R.F., 1995. Un nouveau Liolaemus Andin (Tropiduridae). Revue fr. Aquariol. 22, 107–116.
Martori, R., Aun, L., 2010. Reproducción y variación de grupos de tamaño en una población de Liolaemus koslowskyi (Squamata: liolaemini). Cuadernos de Herpetología 24, 39–55.
Martori, R., Aun, L., Orlandini, S., 2002. Relaciones térmicas temporales en una población de Liolaemus koslowskyi. Cuadernos de Herpetología 16, 33–45.
Medina, C.D., Ávila, L.J., Morando, M., 2013. Hacia una taxonomía integral: Poniendo a prueba especies candidatas relacionadas a Liolaemus buergeri Werner 1907 (Iguania: Liolaemini) mediante análisis morfológicos. Cuadernos de Herpetología 27, 27–34.
Medina, M., Scolaro, A., Méndez-De la Cruz, F., Sinervo, B., Miles, D.B., Ibargüengoytía, N., 2012. Thermal biology of genus Liolaemus: A phylogenetic approach reveals advantages of the genus to survive climate change. J Therm Biol 37, 579–586.
Meiri, S., 2018. Traits of lizards of the world: Variation around a successful evolutionary design. Global Ecology and Biogeography 27, 1168–1172.
Moreno Azócar, D.L., Vanhooydonck, B., Bonino, M.F., Perotti, M.G., Abdala, C.S., Schulte, J.A., Cruz, F.B., 2013. Chasing the Patagonian sun: Comparative thermal biology of Liolaemus lizards. Oecologia 171, 773–788.
Navarro, J., Núñez, H., 1993. Liolaemus patriciaiturrae y Liolaemus isabelae, dos nuevas especies de lagartijas para el norte de Chile. Aspectos biogeográficos y citotaxonómicos (Squamata, Tropiduridae). Boletín del Museo de Historia Natural de Chile 99–113.
Núñez, H., 2007. Liolaemus frassinettii, nueva especie de lagartija para los altos de cantillana, región metropolitana (reptilia: sauria). Boletín del Museo Nacional de Historia Natural, Chile 56, 81–87.
Núñez, H., Navarro, J., Garín, C., Pincheira-Donoso, D., Meriggio, V., 2003. Phrynosaura manueli y Phrynosaura torresi, nuevas especies de lagartijas para el norte de Chile (squamata: sauria). Boletín del Museo Nacional de Historia Natural, Chile 52, 67–88.
Núñez, H., Navarro, J., Loyola, J., 1991. Museo Nacional de Liolaemus maldonadae y Liolaemus cristiani, dos especies nuevas de lagartijas para Chile (Reptilia, Squamata). Boletín del Museo Nacional de Historia Natural, Chile 42, 79–88.
Núñez, H., Pincheira-Donoso, D., 2006. Liolaemus confusus, una nueva especie de lagartija de la cordillera de la costa de Chile central (sauria, liolaeminae): Evidencia fenética y citogenética. Boletín del Museo Nacional de Historia Natural, Chile 75–86.
Núñez, H., Scolaro, J.A., 2009. Liolaemus (donosolaemus) chacabucoense, nueva especie de lagartija para la region de Aisén, Chile (Reptilia: Sauria). Boletín del Museo de Historia Natural, Chile 58, 67–74.
Núñez, H., Yáñez, J., 1983. Ctenoblepharis audituvelatus new species, a lizard from northern Chile (Reptilia: Iguanidae). Copeia 1983, 457.
Ocampo, M., Pincheira-Donoso, D., Sayol, F., Rios, R.S., 2022. Evolutionary transitions in diet influence the exceptional diversification of a lizard adaptive radiation. BMC Ecol Evol 22, 1–10.
Olivera Jara, D.A., Aguilar, C.A., 2020. Dieta de la lagartija neotropical Liolaemus polystictus (Squamata: Liolaemidae) de los andes centrales, Huancavelica, Perú. Rev Peru Biol 27, 339–348.
Ortiz, J.C., 1989. Description de Liolaemus silvai sp. nov. (Sauria, Iguanidae) du « Norte Chico » du Chili. Bulletin du Muséum national d’histoire naturelle. Section A: Zoologie, biologie et écologie animales 11, 247–252.
Pearson, O.P., Bradford, D.F., 1976. Thermoregulation of lizards and toads at high altitudes in Peru. Copeia 1976, 170.
Pincheira-Donoso, D., Scolaro, J.A., 2007. Iguanian species-richness in the Andes of boreal Patagonia: Evidence for an additional new Liolaemus lizard from Argentina lacking precloacal glands (Iguania, Liolaeminae). Zootaxa 1452, 55–68.
Pincheira-Donoso, D., Tregenza, T., 2011. Fecundity selection and the evolution of reproductive output and sex-specific body size in the Liolaemus lizard adaptive radiation. Evolutionary Biology 38, 197–207.
Quinteros, A.S., Abdala, C.S., Gómez, J.M.D., Scrocchi, G.J., 2008. Two new species of Liolaemus (Iguania: Liolaemidae) of central west Argentina. South Am J Herpetol 3, 101–111.
Quinteros, A.S., Ruiz-Monachesi, Abdala, C.S., 2020. Solving the Liolaemus bibronii puzzle, an integrative taxonomy approach: redescription of L. bibronii and description of three new species (Iguania: Liolaemidae). Zool J Linn Soc 189, 315–348.
Quinteros, A.S., Valladares, P., Semham, R., Acosta, J.L., Barrionuevo, S., Abdala, C.S., 2014. A new species of Liolaemus (Iguania: Liolaemidae) of the alticolor-bibronii Group from northern Chile. South Am J Herpetol 9, 20–29.
Ramirez Pinilla, M.P., 1991. Reproductive and fat body cycles of the viviparous lizard Liolaemus huacahuasicus. J Herpetol 25, 205-208.
Ramirez Pinilla, M.P., 1994. Reproductive and fat body cycles of the oviparous lizard Liolaemus scapularis. J Herpetol 28, 521-524.
Ramirez Pinilla, M.P., 1995. Reproductive and fat body cycles of the oviparous lizard Liolaemus bitaeniatus (Sauria: Tropiduridae). J Herpetol 29, 256-260.
Reyes-Olivares, C., Hiriart, D., Marambio-Alfaro, Y., 2020. Predation on Liolaemus atacamensis Müller and Hellmich, 1933 (Squamata, Liolaemidae) by Callopistes maculatus Gravenhorst, 1838 (Squamata, Teiidae) in the Atacama Desert. Herpetol Notes 13, 267–269.
Robles, C., Halloy, M., 2011. Observaciones preliminares sobre la historia natural de Liolaemus heliodermis (Iguania: Liolaemidae): una lagartija endémica del Noroeste Argentino. Acta Zoologica Lilloana 55, 264–271.
Robles, C.I., Halloy, M., 2017. Thermal ecology of two syntopic lizard species of the genus Liolaemus (Iguania: Liolaemidae) in north western Argentina. North West J Zool 13, 44–48.
Santoyo-Brito, E., Fox, S.F., Núñez, H., 2018. Age estimation through skeletochronology and mark-recapture of free-living Liolaemus leopardinus (Squamata: Liolaemidae) from Chile. Phyllomedusa 17, 101–112.
Scolaro, J.A., Cei, J.M., 2006. A new species of Liolaemus from central steppes of Chubut, Patagonia Argentina (Reptilia: Iguania: Iguanidae). Zootaxa 1133, 61–68.
Scolaro, J.A., Cei, J.M.A.M., 1997. Systematic status and relationships of Liolaemus species of the archeforus and kingii groups. Boll. Mus. reg. Sci. nat. Torino 15, 369–406.
Scolaro, J.A., Videla, F., Puig, S., Marcus, A., 2007. Diferencias morfológicas y status taxonómico de las especies simpátricas Liolaemus coeruleus y Liolaemus neuquensis (Reptilia: Iguania: Liolaemidae). Multequina 16, 53–63.
Stellatelli, O.A., Vega, L.E., Block, C., Cruz, F.B., 2013. Effects on the thermoregulatory efficiency of two native lizards as a consequence of the habitat modification by the introduction of the exotic tree Acacia longifolia. J Therm Biol 38, 135–142.
Stellatelli, O.A., Vega, L.E., Block, C., Rocca, C., Bellagamba, P.J., Cruz, F.B., 2020. Latitudinal comparison of the thermal biology in the endemic lizard Liolaemus multimaculatus. J Therm Biol 88, 102485.
Troncoso-Palacios, J., Díaz, H.A., Esquerré, D., Urra, F.A., 2015a. Two new species of the Liolaemus elongatus-kriegi complex (Iguania, Liolaemidae) from Andean highlands of southern Chile. Zookeys 500, 83–109.
Troncoso-Palacios, J., Diaz, H.A., Puas, G.I., Riveros-Riffo, E., Elorza, A.A., 2016a. Two new Liolaemus lizards from the Andean highlands of Southern Chile (Squamata, Iguania, Liolaemidae). Zookeys 632, 121–146.
Troncoso-Palacios, J., Elorza, A.A., Puas, G.I., Alfaro-Pardo, E., 2016b. A new species of Liolaemus related to L. nigroviridis from the Andean highlands of Central Chile (Iguania, Liolaemidae). Zookeys 555, 91–114.
Troncoso-Palacios, J., Garin, C.F., 2013. On the identity of Liolaemus nigromaculatus Wiegmann, 1834 (Iguania, Liolaemidae) and correction of its type locality. ZooKeys 294: 37-56 294, 37–56.
Troncoso-Palacios, J., Labra, A., 2012. Is the exploratory behavior of Liolaemus nitidus modulated by sex? Acta Herpetol 7, 69–80.
Troncoso-Palacios, J., Schulte, J.A., Marambio-Alfaro, Y., Hiriart, D., 2015b. Phenotypic variation, phylogenetic position and new distributional records for the poorly known Liolaemus silvai Ortiz, 1989 (Iguania: Iguanidae: Liolaemini). South Am J Herpetol 10, 71–81.
Valdecantos, M.S., Arias, F., Espinoza, R.E., 2012. Herbivory in Liolaemus poecilochromus, a Small, Cold-Climate Lizard from the Andes of Argentina. Copeia 2012, 203–210.
Valdecantos, S., Lobo, F., Martinez, V., 2007. Estimación de edades, tamaño corporal y adquisición de la madurez sexual en dos especies de Liolaemus (Iguania: Liolaemidae). Cuadernos de Herpetología 21, 31–44.
Valdecantos, S., Martínez, V., Lobo, F., Cruz, F.B., 2013. Thermal biology of Liolaemus lizards from the high Andes: Being efficient despite adversity. J Therm Biol 38, 126–134.
Vanhooydonck, B., Cruz, F.B., Abdala, C.S., Azócar, D.L.M., Bonino, M.F., Herrel, A., 2010. Sex-specific evolution of bite performance in Liolaemus lizards (Iguania: Liolaemidae): The battle of the sexes. Biological Journal of the Linnean Society 101, 461–475.
Vega, L.E., 1997. Reproductive activity and sexual dimorphism of Liolaemus multimaculatus (Sauria Tropiduridae). Herpetological Journal 7, 00–00.
Vega, L.E., Bellagamba, P.J., 2005. Ciclo reproductivo de Liolamus gracilis Bell, 1843 (Iguanidae: Tropidurinae) en las dunas costeras de Buenos Aires, Argentina. Cuadernos de Herpetología 18, 3–13.
Verrastro, L., 2004. Sexual dimorphism in Liolaemus occipitalis (Iguania, Tropiduridae). Iheringia Ser Zool 94, 45–48.
Videla, F., Cei, J.M., 1996. A new peculiar Liolaemus species of the “chiliensis” phyletic group from the volcanic Cordilleran landscapes of Southern Mendoza Province, Argentina (Iguania, Lacertilia, Reptilia). Boll. Mus. reg. Sci. nat. Torino 14, 505–516.
Villavicencio, H.J., Acosta, J.C., Cánovas, M.G., Marinero, J.A., 2003. Dimorfismo sexual de Liolaemus pseudoanomalus (Iguania: Liolaemidae) en el centro-oeste de Argentina. Rev Esp Herpetol 17, 87–92.
Villavicencio, H.J., Acosta, J.C., Marinero, J.A., Cánovas, M.G., 2007. Thermal ecology of a population of the lizard, Liolaemus pseudoanomalus in western Argentina. Amphibia-Reptilia 28, 163–165.
Yáñez, J.L., Núñez, H., 1983. Liolaemus fabiani, a new species of lizard from northern Chile (Reptilia: Iguanidae). Copeia 1983, 790.

## Sheet: ReedMe
Notes
Liolaemus cf. elongatus (MCC tree from Esquerré et al., 2019)= Liolaemus lonquimayensis
Liolaemus riodamas (MCC tree from Esquerré et al., 2019)= Liolaemus thermarum
MAT= Mean Annual Temperature
